# Supplementary material for: Human CHD1 is required for early DNA-damage signaling and is uniquely regulated by its N terminus
Source: PubMed Central journal article supplement — Nucleic Acids Res. 2018 Feb 26;46(8):3891–905. doi: 10.1093/nar/gky128 (PMC5934646; doi:10.1093/nar/gky128), 2018-02-26
Supplement: gky128_supp.pdf [file gky128_supp.pdf]

## SUPPLEMENTAL FIGURE LEGENDS

**Figure S1. CHD1-KO RPE1 cells show normal growth and checkpoint activation after irradiation.** Related to Figures 1 and 2. (A) The number of viable cells were measured in 5 consecutive days using the CellTiter-Glo® Luminescent Cell Viability Assay kit (Promega). The number of cells on each day was normalized to day 1. (B). Cell cycle analysis to determine whether CHD1-KO cells are proficient in DNA damage checkpoint. Cells were treated with 5 Gy IR. To monitor DNA synthesis, EdU was added to medium 1 hour before fixing cells. DNA content was visualized by PI. (C) Cell cycle profiles of WT and CHD1-KO cells after IR (5 Gy). The cell cycle profiles were analyzed using CytoFlex based on the EdU and PI staining. (D) CHK2 phosphorylation on Thr68 was detected in both WT and CHD1-KO cells after IR (5 Gy) of irradiation. Western blotting was performed using antibodies against phospho-CHK2 (Thr68), actin, or CHD1.

**Figure S2. The gating schemes of GFP-based repair assays, schematics of the GFP repair assays, and representative raw FACS data.** Related to Figure 1 and 2. (A) Profiles of GFP positive cells were acquired on CytoFLEX flow cytometer (Beckman Coulter). The acquired data were analyzed by the CytExpert software (Beckman Coulter), by subsequently defining cells (P1), live cells (P2), single live cells (P3), and GFP-positive single cells (P4). (B) An illustration of the NHEJ repair substrate (EJ5), related to Figure 1. (C) An illustration of the DR-GFP repair assay substrate. (D) Representative flow cytometry profile of GFP-positive cells after I-SceI cleavage in U2OS cells treated with siControl or siCHD1.

**Figure S3. Additional ChIP data showing reduced  $\gamma$ H2AX and H2AX accumulation at the induced DSB site.** Related to Figure 2. (A)  $\gamma$ H2AX formation at the DSB created by the ZFN nuclease in control siRNA- or siCHD1-treated T98G cells. The percentage of DNA immunoprecipitated by ChIP was normalized to input, and the fold enrichment of  $\gamma$ H2AX before

and after ZFN cleavage was calculated and shown. (B) An independent repeat of the same experiment as shown in (A). (C) H2AX deposition before and after ZFN cleavage at the DSB site in siControl- or siCHD1- treated T98G cells. H2AX ChIP with ZFN was normalized to without ZFN. (D) An independent repeat of the same experiment as shown in (C). At least two qPCR reactions were performed for each data point.

**Figure S4.  $\gamma$ H2AX formation, MRE11 recruitment and checkpoint proficiency in CHD1-KO cells.** Related to Figure 2. (A) Western blot of  $\gamma$ H2AX after irradiation (5 Gy) in WT and CHD1-KO cells.  $\gamma$ H2AX levels in all samples were normalized to time-0 (No IR) of WT cells (black bars); and  $\gamma$ H2AX levels were normalized to their own time-0 (No IR) for either WT or CHD1-KO cells (blue bars). (B) Representative images of laser striping experiments showing MRE11 recruitment to laser tracts in WT and CHD1-KO cells. Cells were fixed 5 min after laser striping and stained for MRE11 and  $\gamma$ H2AX. (C) Quantification of MRE11 recruitment in the laser tracts in WT and CHD1-KO cells. N > 100 of stripes from two experiments were counted.

**Figure S5. Alignment of the full-length human CHD1 and CHD2 proteins.** The gray boxes highlight the identical amino acids. The N terminus of CHD1, as specified in this study (*i.e.*, amino acids 1-271), is outlined in a box. The red arrowheads indicate the sites where the deletions were made for the experiments shown in Figure 5. The deletion of the whole N terminus is referred to as  $\Delta$ N.

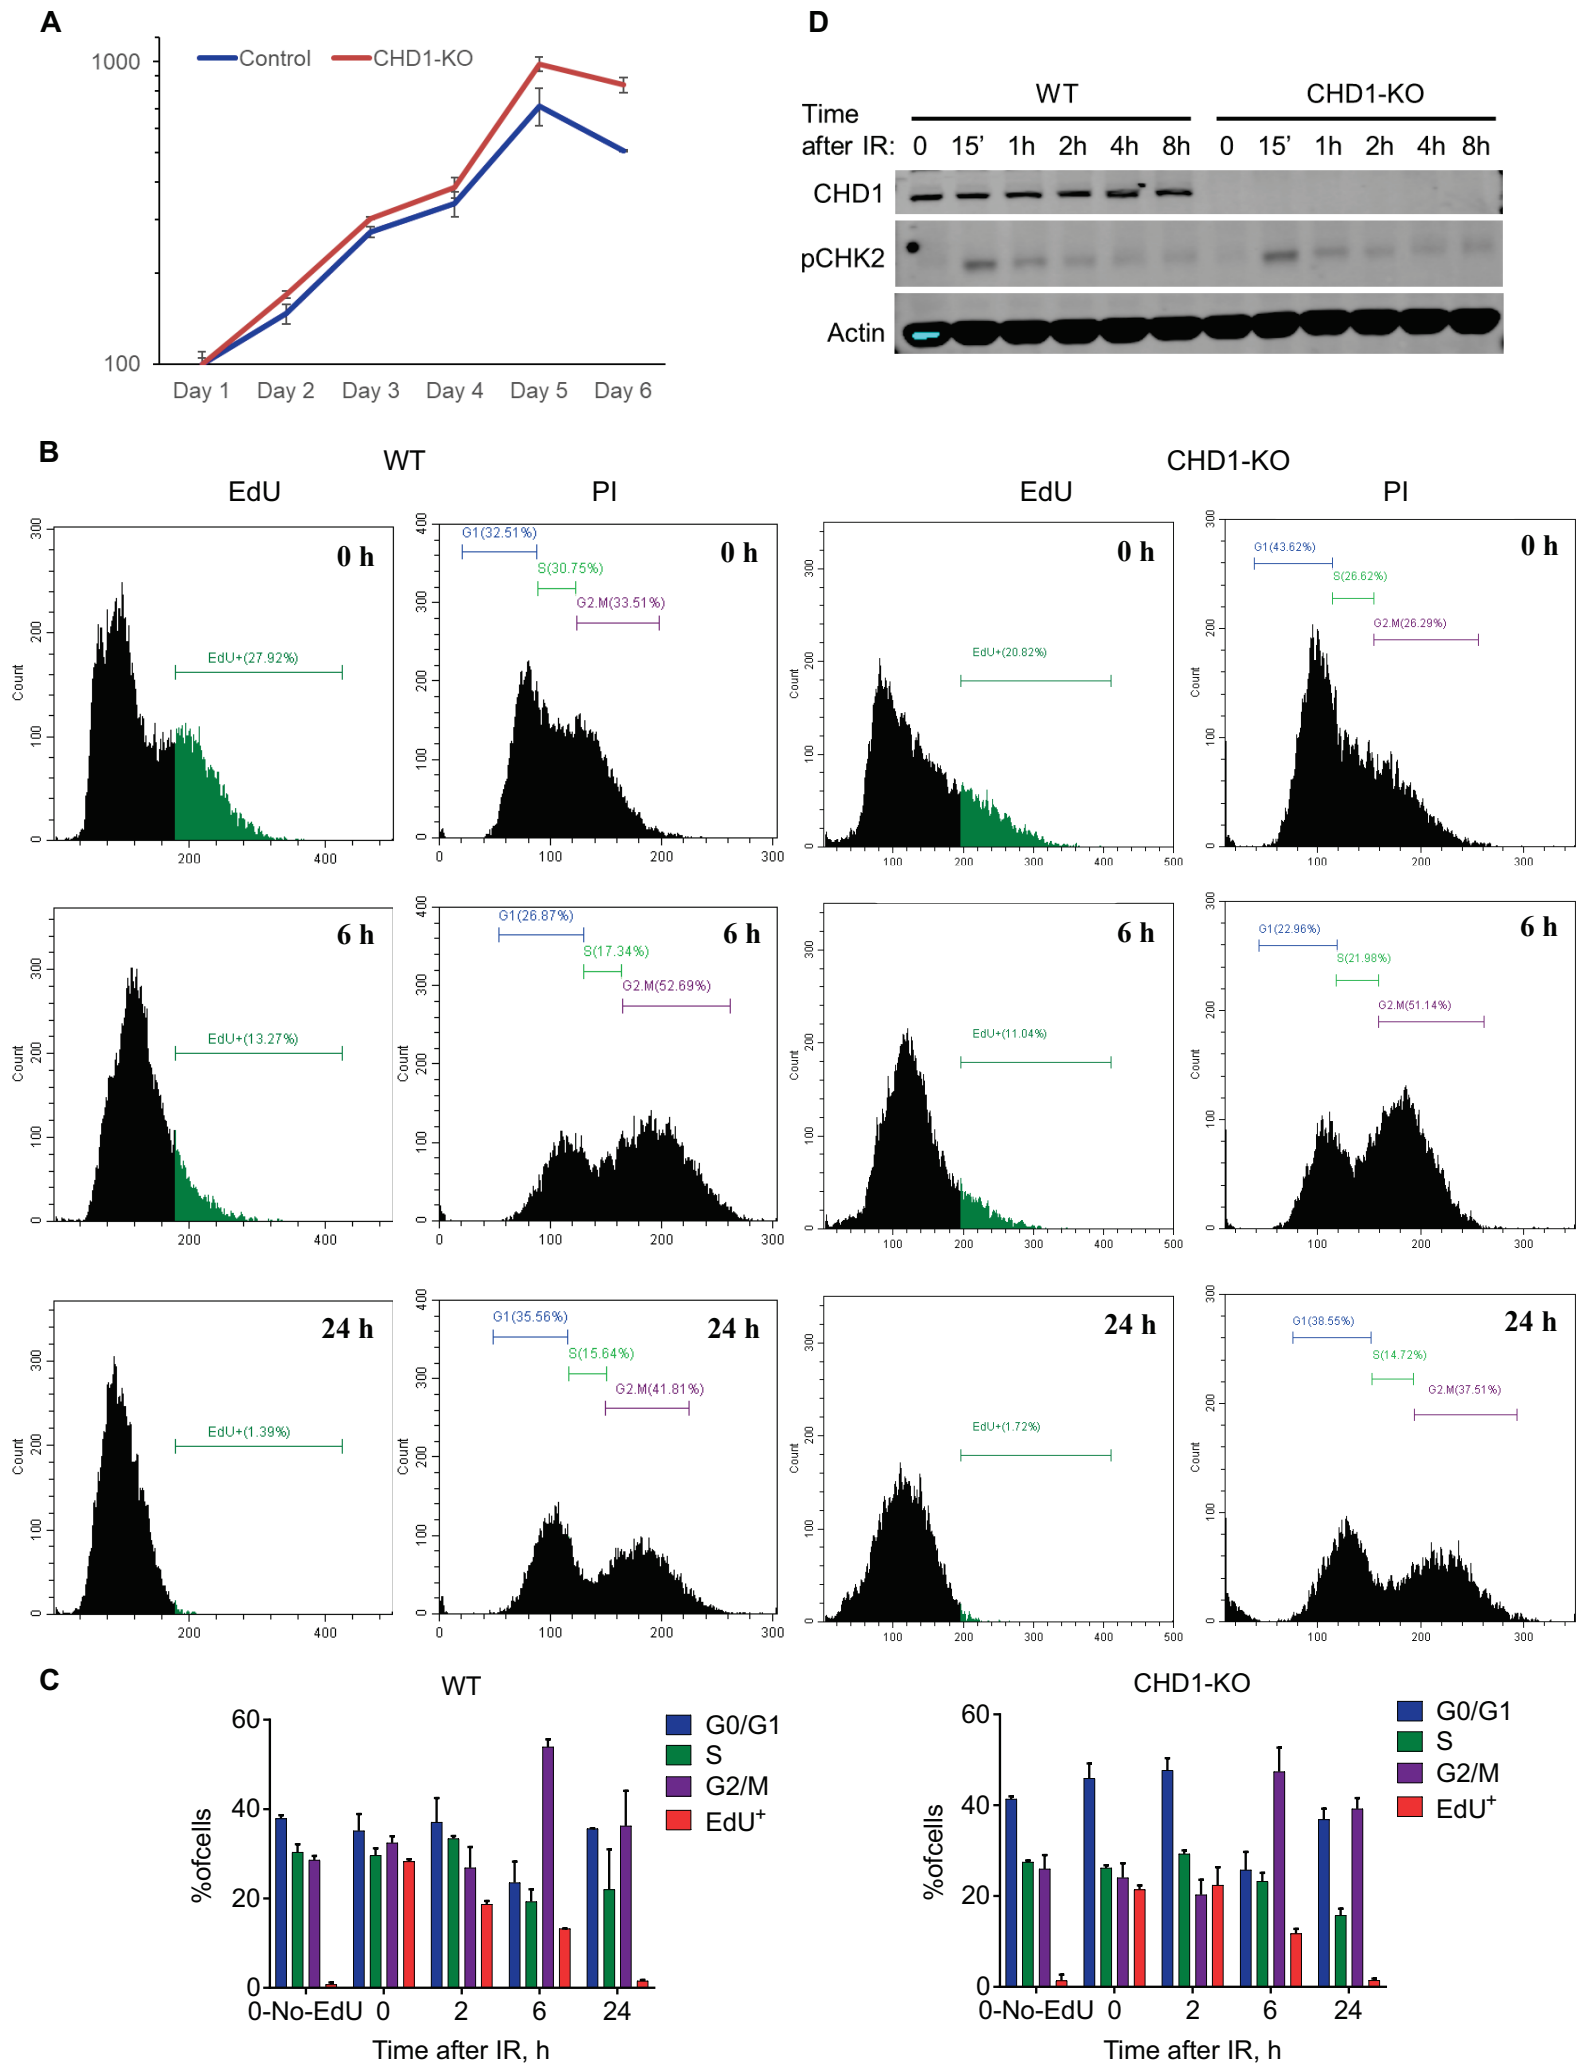

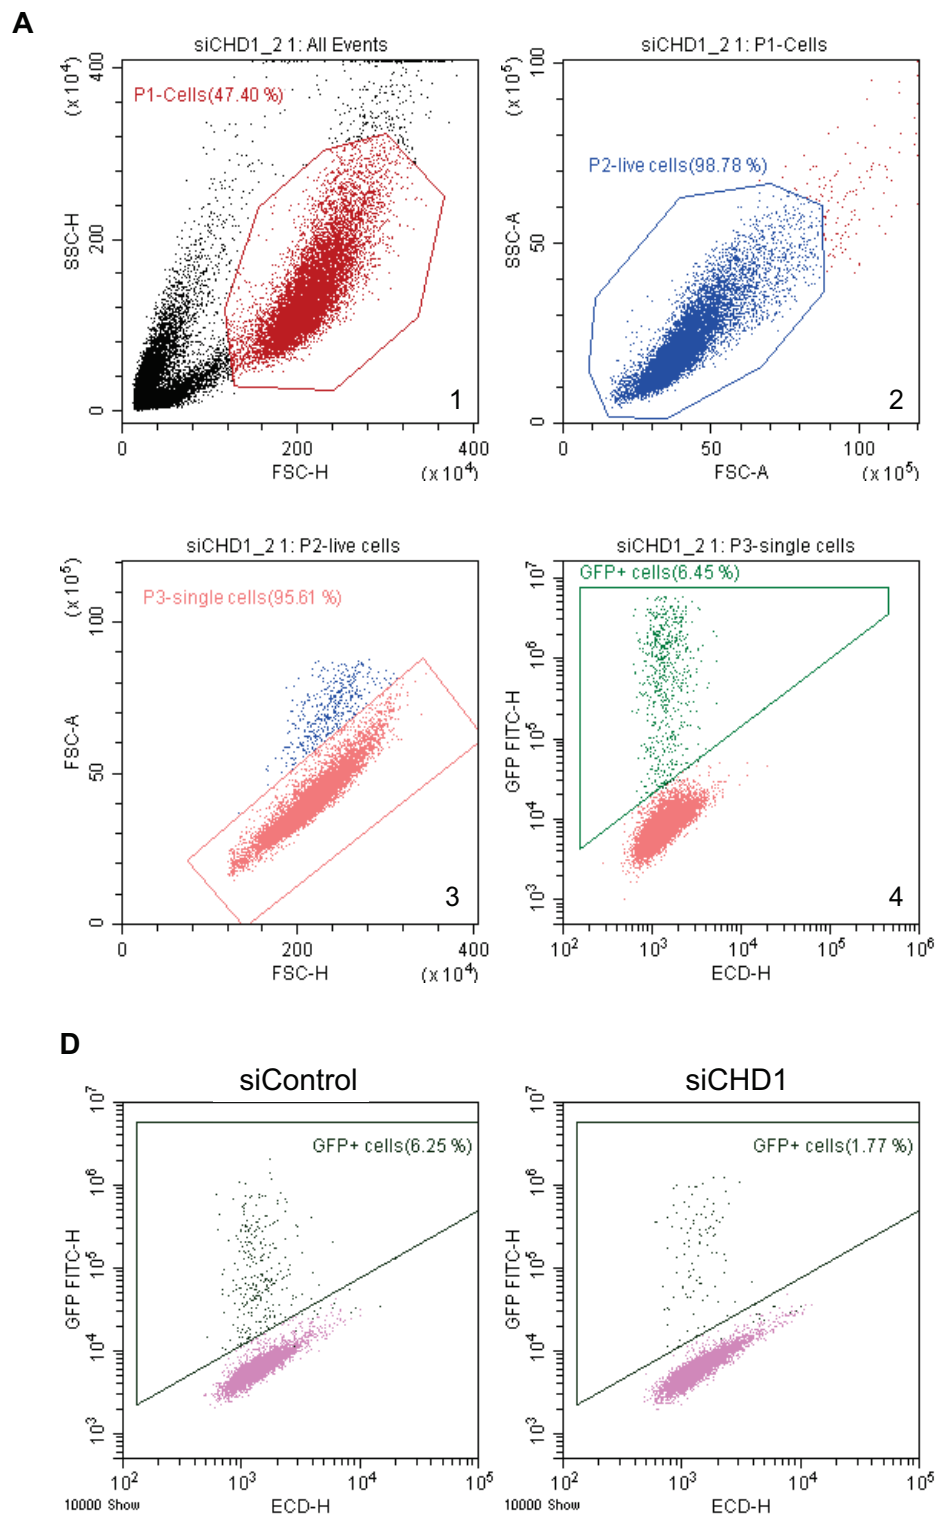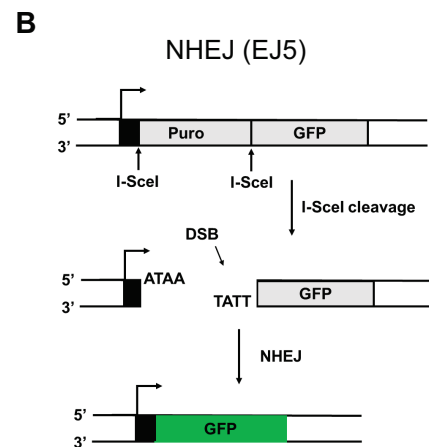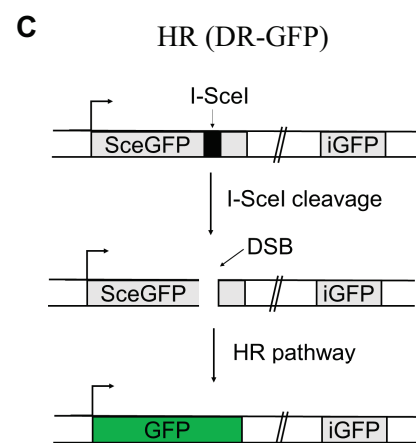

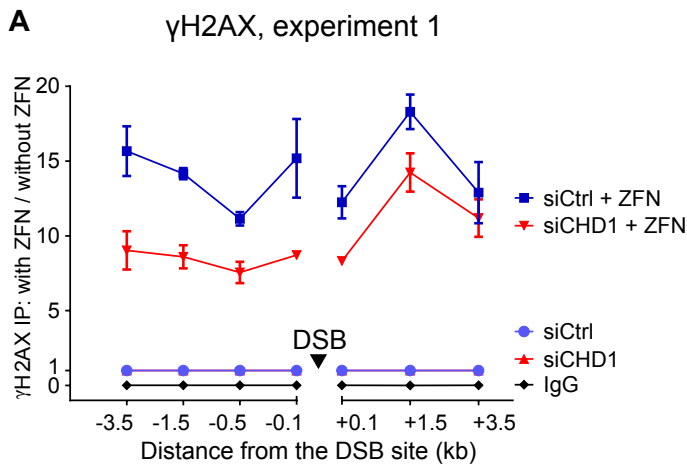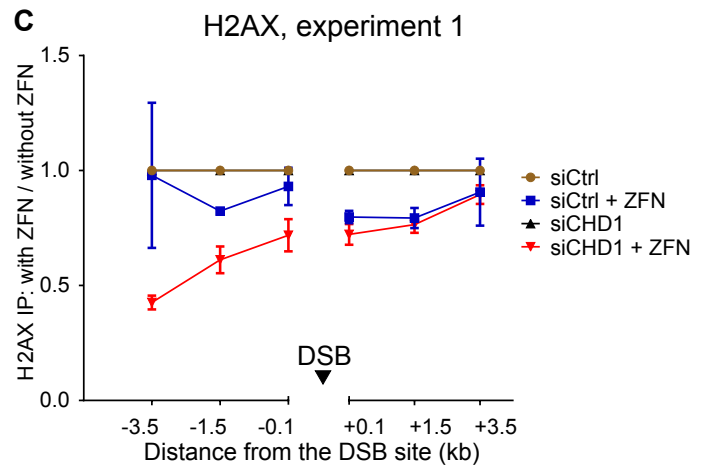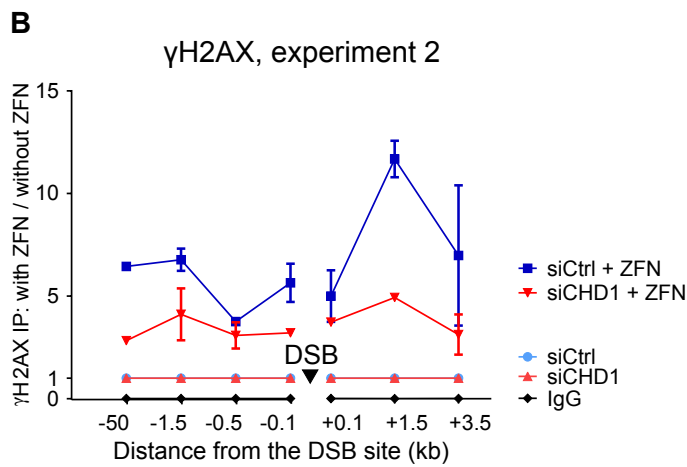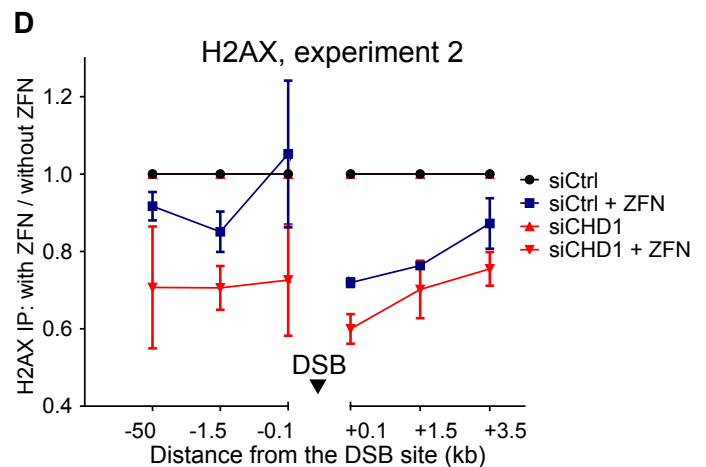

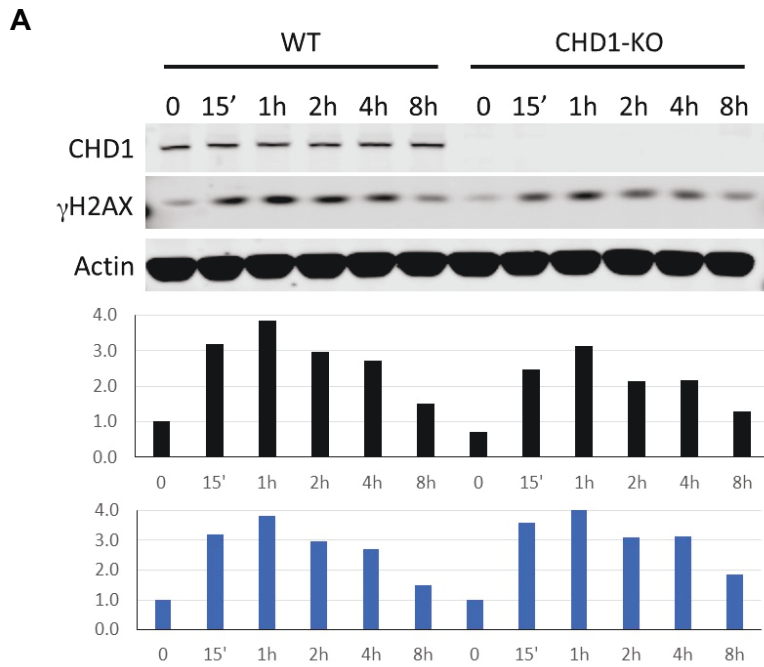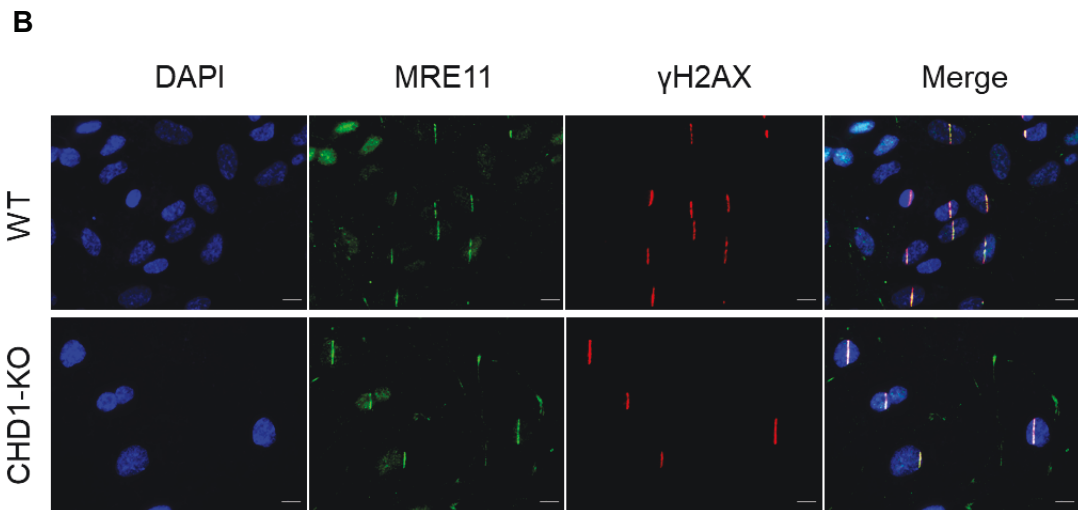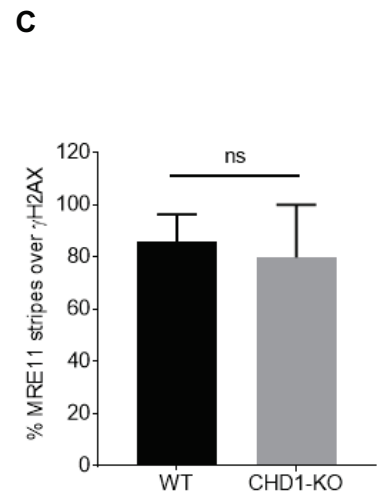

```

hCHD1 MNGHS---EE SVRNSGESSQDDDSGSASGSGSGSSGSSD-GSSSQGSSDSDSGSESGQSESESDTSREN----KVQAKPKPK----VDGAEFWKSSPSILA 95
hCHD2 MMRNKKKSQEE DSSLHNSASSHASEEASGSDSGSQSESEQGSDFGSGHGSESNSSSESESSQSESESESSAGSKSQPVLPEAKEKPKASKKERIADVKKMWEEYEDVYG 108
VORSAILKKQQQQQQQHQASNSGSEEDSSSEEDSDSSSEVKKKKKDEEDWQMSGSGSPSQSGSDSESE--EREKSSCDETESDYEPKKNVKSARKPQNRSKSKNG 202
VRRSNRSR-QEFSRFNIKEEAS--SGSE---SGSPKRRGQ----RQLKKQEKKKQEPSSEDEQEQTSAESEPEQKKVKARRPVPRTVPEKPRVK-KQE---KTQRG 200
KKILGQKKRQIDSSSEDDDEEDYDNDKRSSRRQATVNVSYKEDDEEMKTDSDDLLVCGEDVDPQPEEEEFETIERFMDCRIQRKATGATTTIYAVEADGDFNAGFEKN 310
K----RKKQ--DSSDEDDDD--DEAPKRQTRRRRAAKNVSYKEDDDFETDSDLLIEMTGEVDE-QQDNSETIEKVLDSRLGKKKATGASTTVYAIENGDSGDDTE 299
KEFGEIQYLIKWKWSHIHNTWETEETLKQONVRMKKLDNYKKKDOETKRWLKNASPEDVEYYNCQQLTDDLHKQYQIVERIITAHSNQKSAAG----- 405
KDEGEIQYLIKWKWSYIHSTWSEESLQQQKVKGLKLENFKKKEDIKQWLGKVS PEDVEYFNCQQLASEL NKQYQIVERVLAVKTSKSTLQTDPAHSRKPAP 407
--YEDYYCKWQGLPYSECSWEDGALISKKFQACIDEYFSRNQSKTTFKDKVVKQRPRFVALKKQPSYIGGHEGLELRDYQLNGLNWLHAWSCKGNSCILADEMGLG 511
SNEFEMLCWKWGLPYSECSWEDGALIGKKFQNCIDSFHNRNNSKTIPTRECKALKQRPRFVALKKQPAVYLGGENLELRDYQLEGLNWLHAWSCKNNSVILADEMGLG 514
KTIQTISFLNYLFHQHLYGPFILVVP LSTLTSWOREIQTWASQMNNAVYVLDINSRNMIRTHEWTHHQTKRLKFNILLTTEYIILLKDRAFGLGLNWAFIGVDEAHR 619
KTIQTISFLSYLFHQHLYGPFILVVP LSTLTSWOREFETWAPENVVYIIGDLSRNTIREYEWIHSQTKRLKFNALITTEYIILLKDRTVLGSINWAFGLVDEAHR 622
KNDDSLLYKTLIDFKSNHRLITGTPLQNSLKLWLLHFIMPEKFFSWEDFEEEHGKGREYGYASLHKELEPFLLRVVKDVEKSLPAKVEQILRMEMSALQKQYYK 727
KNDDSLLYKTLIDFKSNHRLITGTPLQNSLKLWLLHFIMPEKFEFFWEDFEEDHGKGRENGYQSLHKVLEPFLLRVVKDVEKSLPAKVEQILRVEMSA LQKQYYK 730
WILTRNYKALSKGSKGSTSGFLNIMMELKCCNHCYLIKPPDNMEFYKQEBALQHLIRSSGKLI LLDKLIIRLRERGNRVLIFSQMVRMLDILA EYIKYRQFPFORLD 835
WILTRNYKALAKGTRGSTSGFLNIVMELKCCNHCYLIKPPENNERENGQETIILSLIRSSGKLI LLDKLIIRLRERGNRVLIFSQMVRMLDILA EYITIKHYFPFORLD 838
GSIKGLLRKQALDHFNAEGSEDFCFLSTRAGGLGINLASADTVVIFSDWNPQNDLQAQARAHRI GQKKQVNIYRLVTKGSVEEDILERAKKMMVLDHLVIQRMDDTT 943
GSIKGLTRKQALDHFNADGSEDFCFLSTRAGGLGINLASADTVVIFSDWNPQNDLQAQARAHRI GQKKQVNIYRLVTKGTVEEELIERAKKMMVLDHLVIQRMDDTT 946
GKTVLHTGSAPSSSTPFNKEELSAILKFGAEE LFKEPEGEEQEPQEMDIDEILKRAETHENEPGLTVGDELLSQKVANFSNMDEDDIELEPERNSKNWEEIIPEDQ 1051
GRITILENNSGRSNPNPFNKEELTAILKFGAEDLFKELEGESEEPQEMDIDEILRLAETRENE-VSTSATDELLSQKVANFATME-DEEEL-ERPHKDWDEIIPEEQ 1051
RRLEEEERQKELEEIYMLPRMNCARQISFNGS---EGRRSRSRYSGSDSDS--ISEGKRPKKRGRPRPTIPRENIGFSDAEIRRFIKSYKKFGGPLERLDAIAR 1153
RKVVEEERQKELEEIYMLPRISSSTKAQTNDS DSDTESKR-QAQRSSASESETEDSDDDKPKRRGRPRSVRKDLVEGFTDAEIRRFIKAYKKFGLPLERLECIAR 1158
DAELVDKSETDLRRLGELVHNGCIKALKDSSSGTERTG--GR-LGKVKGPTFRISGVQVNAKLVISHEEELIPLHKSIPSDPEERKQYTIPOHTKAAHFDIDWGKEDD 1258
DAELVDKSVADLKR LGELIHNSGVSA MQEYEEQLKENASEGKGPGRRGPTIKISGVQVNVKSIHQHEEFEMLHKSIPVDPEEKKKYCLTQRVKAAHFDVWGVVEDD 1266
SNLLIGIYIYGYGSWEMIKMDFDLSLTHKILFDDPKKPQAKQLQTRADYI IKLISRD LAKKEALS GAGSSRRKARAKKNKAMSIKVKKEIKSDSS-F----LPSE 1361
SRLLLGIYEHGYGNWELIKTDPKILKLDKILFVETDKKPQGGKQLQTRADYILKLRKGLKKGAVTGEEAKLKKRKPVKKENKVPRLKEEHGIELSSPRHSDNPSE 1374
KSDDEDKLSSES-----KSD--G-RERSK-----KSSVSDAPVHITASGEVPVISE-ESEELDQKTF SICKERM RPVKAA 1427
EGEVKDDGLEKSPMKKKQKKKENKENKEKQMSRDKKEGDKERKSKDKKPKSGDAKSSSKSKRSQGPVHITAGSEVPVIGEDDDDDLDQETFSICKERM RPVKAA 1482
LKQLDRFEKGISEREQLEHTRQCLIKIGDHI TECLKEYTNPEQIKQWRKNLWIFVSKFTEFDARKLHKLYKHAIKKR---QESQNSQNSN----LNFHVIRNP-DV 1527
LKQLDKFDKGLNVQEQLEHTRNCLIKIGDRIAECLKAYSQDEHIKLRNRLWIFVSKFTEFDARKLHKLYKMAHKKRSQEEEQKKKDVTGKKKPFREASGSSRDS 1590
ERLKENIHDSSRSDSYSDDRILTOYFDHKKRHHQGDSD---YKSD---SKRPYSSFSNGKDRDWD---HYKQDSRYSDREK--HRKLDHRSRDHRSNLEGSL 1623
LISQSHSHNLHPQKPHLPASGPOMHGHPRDNYNHPNKRHFSNADRGDWQER-KFN YGGGNNPPGSDRHQYEQHWKDDHHYGDRHMDAHRSGSYRPNMMSRK 1697
K-----DRSHSDHRSRSHRHS DHRSSSE-----YTHKSSR---DYR---YHSDWQMDHRASS-----SGPRSELDQRSPYGS----- 1687
RPYDQYSSDRDRGRHRDYDRHHDSKRRRDEFRFQNYHQDFRMSDRHPAMGYHQGQPSDHYRSFHTDKLGEYKQPLPPLHFAVSDPERSPSQKSPHDSKSPLDH 1805
RSFFHSHVHKSTPEHTSSRKT 1710
RSFLERSLEQNNEDYNWNRKT 1828

```

**Supplemental table 1. Sequences of primers used in ChIP-qPCR. Related to Figure 2 and**

Figure S3.

| Name     | Sequence (5' to 3')    |
|----------|------------------------|
| F -50kb  | GCTCTCTCCTTCCACACACC   |
| R -50kb  | CTCAGGTCCAGGAATGAAGG   |
| F -3.5kb | CCGAGATCACATCACTGCAC   |
| R -3.5kb | GGAAAGAGGAGGGAAGAGGA   |
| F -1.5kb | GGGGCAGTCTGCTATTCATC   |
| R -1.5kb | CGATGCACACTGGGAAGTC    |
| F -0.5kb | TGGGTTCCCTTTTCCTTCTC   |
| R -0.5kb | GTCCAGGCAAAGAAAGCAAG   |
| F -0.1kb | CTTAGAGGTTCTGGCAAGGAG  |
| R -0.1kb | ACAGAAAAGCCCCATCCTTAG) |
| F +0.1kb | AGAACCAGAGCCACATTAACC  |
| R +0.1kb | CACTTCAGGACAGCATGTTTG  |
| F +1.5kb | CCTCAGCTCCAGTTCAGGTC   |
| R +1.5kb | GGCTGTCACACTCCAGTTCA   |
| F +3.5kb | TCGCCAGTGCTTTTTCTTTT   |
| R +3.5kb | GTTGGGGGATGATGAAAATG   |
| DSB-For  | CGGTTAATGTGGCTCTGGTT   |
| DSB-Rev  | ACAGGAGGTGGGGGTTAGAC   |
